# Supplementary material for: Formation of WO3nanotube-based bundles directed by NaHSO4and its application in water treatment
Source: Royal Society of Chemistry journal article supplement (doi:10.1039/c2ta00382a), 2012-11-08
Supplement: c2ta00382a.pdf [file c2ta00382a.pdf]

# Formation of WO<sub>3</sub> Nanotube-based Bundles Directed by NaHSO<sub>4</sub> and Its Application in Water Treatment

Jin Li,<sup>a</sup> Xiaoheng Liu,<sup>\*a</sup> Qiaofeng Han,<sup>a</sup> Xiayi Yao,<sup>a</sup> Xin Wang<sup>\*a</sup>

<sup>a</sup> Key Laboratory of Education Ministry for Soft Chemistry and Functional Materials, Nanjing University of Science and Technology, Nanjing 210094, China.

Table S1. Pore size, BET surface area, micropore surface area and pore volume parameters of the sample.

| sample                      | pore size<br>(nm) | BET surface area <sup>a</sup><br>(m <sup>2</sup> /g) | pore volume<br>(cm <sup>3</sup> /g) | micropore surface area <sup>b</sup><br>(m <sup>2</sup> /g) |
|-----------------------------|-------------------|------------------------------------------------------|-------------------------------------|------------------------------------------------------------|
| as-obtained WO <sub>3</sub> | 12.50             | 27.83                                                | 0.05                                | 6.32                                                       |

a: Calculated from the desorption branches. b: Calculated by the *V*-*t* method.

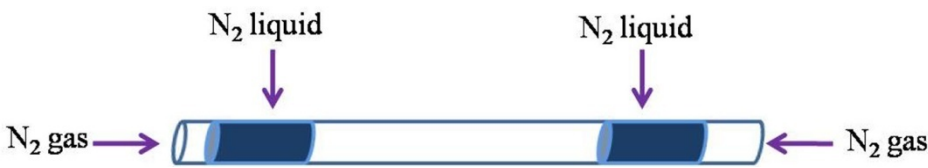

Scheme S1. A possible process of nitrogen liquefaction inside a long nanotube during BET measurement.

Scheme S1 describes a possible result of nitrogen absorption inside a long nanotube during BET measurement. Because the nanotube with the length of more than 1 μm (Fig. 1a and Fig. S2a) is too long, condensed nitrogen liquid can block two inlet of the nanotube. Thus not all inside surface can be occupied by nitrogen molecules, resulting in false data (surface area and pore volume) listed in Table S1.

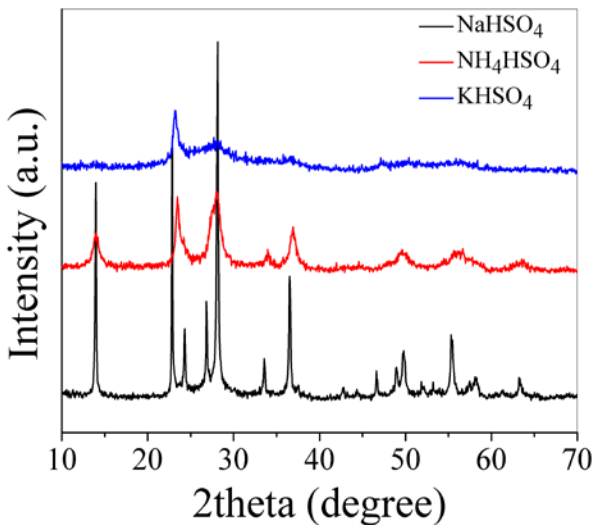

Fig. S1. XRD patterns of the as-obtained samples prepared with NaHSO<sub>4</sub>, NH<sub>4</sub>HSO<sub>4</sub>, KHSO<sub>4</sub>, respectively.

Fig. S1 presents XRD patterns of three WO<sub>3</sub> samples prepared with NaHSO<sub>4</sub>, NH<sub>4</sub>HSO<sub>4</sub> and KHSO<sub>4</sub>, respectively. The sample from NaHSO<sub>4</sub> has highest crystallinity, while the crystallization of other two samples is quite different from NaHSO<sub>4</sub>-assisted.

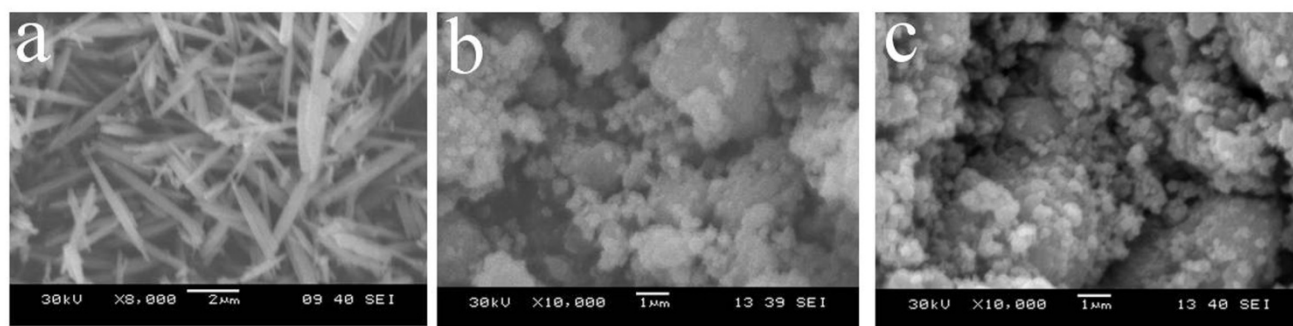

**Fig. S2.** SEM images of the  $\text{WO}_3$  samples prepared with different reagents: (a)  $\text{NaHSO}_4$ , (b)  $\text{NH}_4\text{HSO}_4$ , (c)  $\text{KHSO}_4$ .

The SEM observations (Fig. S2) can also present analogous result. Fig. S2a exhibits  $\text{WO}_3$  sample from  $\text{NaHSO}_4$  with rod-like morphology, but the others (Fig. S2 b,c) exhibit spherical morphology.

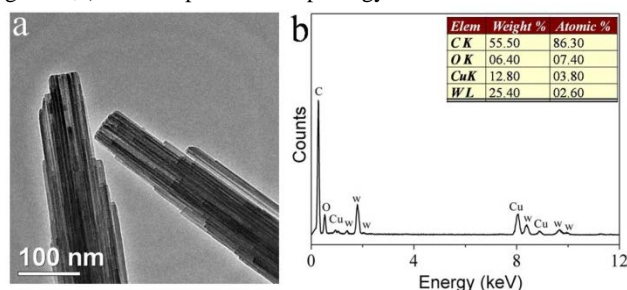

**Fig. S3.** (a) TEM image of the  $\text{WO}_3$  sample in Fig. S2(a). (b) Energy dispersive X-ray spectroscopy (EDS) of the  $\text{WO}_3$  sample in Fig. S3(a).

Fig. S3a is a TEM image of the  $\text{WO}_3$  sample in Fig. S2a, and the structure of nanotube bundles can be seen. Furthermore, the chemical composition of the obtained nanotube bundles was analyzed by using energy-dispersive spectroscopy (EDS). The EDS spectrum (Fig. S3b) exhibits the existence of W and O with a molar ratio close to 1:3.
